# Supplementary material for: Water-Deprived Parasitic Wasps (Pachycrepoideus vindemmiae) Kill More Pupae of a Pest (Drosophila suzukii) as a Water-Intake Strategy
Source: PubMed Central journal article supplement (PMC6400901; doi:10.1038/s41598-019-40256-8), 2019-03-05
Supplement: 41598_2019_40256_MOESM1_ESM.pdf [file 41598_2019_40256_MOESM1_ESM.pdf]

**Water-Deprived Parasitic Wasps (*Pachycrepoideus vindemmiae*) Kill More Pupae of a Pest (*Drosophila suzukii*) as a Water-Intake Strategy**

Cherre Sade Bezerra Da Silva\*<sup>1</sup>, Briana Elizabeth Price<sup>1,2</sup>, Vaughn M. Walton<sup>1,3</sup>

\*Corresponding author. Current affiliation: Embrapa Algodão. Address: Rua Oswaldo Cruz 1143, Campina Grande, PB, Brazil, 58428-095. E-mail: [entomologista@gmail.com](mailto:entomologista@gmail.com), Orcid: 0000-0001-9415-6337

<sup>1</sup>Department of Horticulture, Oregon State University, 4017 Agricultural and Life Sciences Building, Corvallis, OR 97331, USA. Phone: +1 (541) 737 3913

<sup>2</sup>E-mail: [priceb@oregonstate.edu](mailto:priceb@oregonstate.edu)

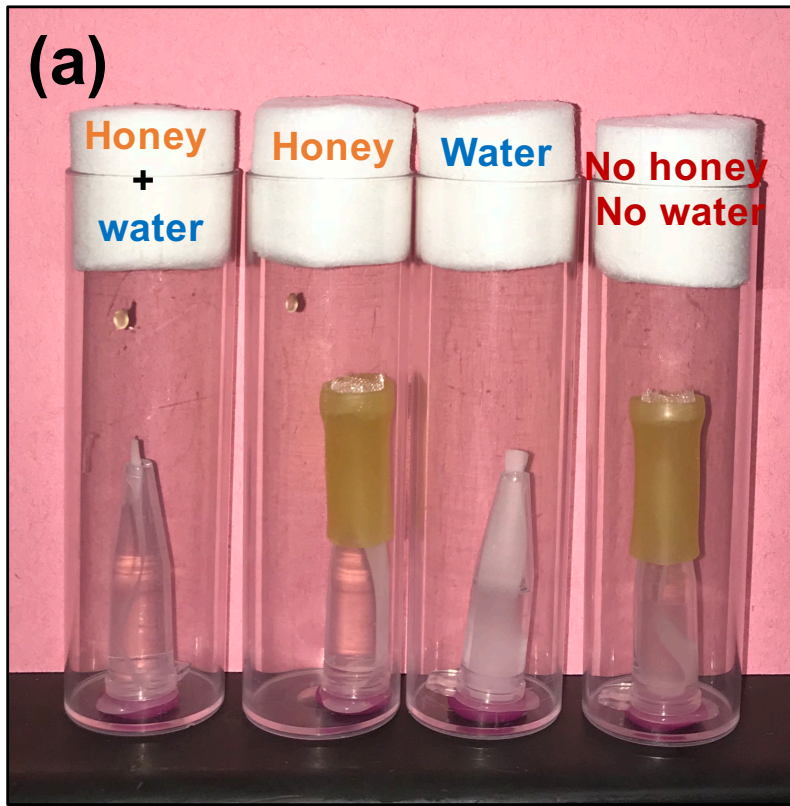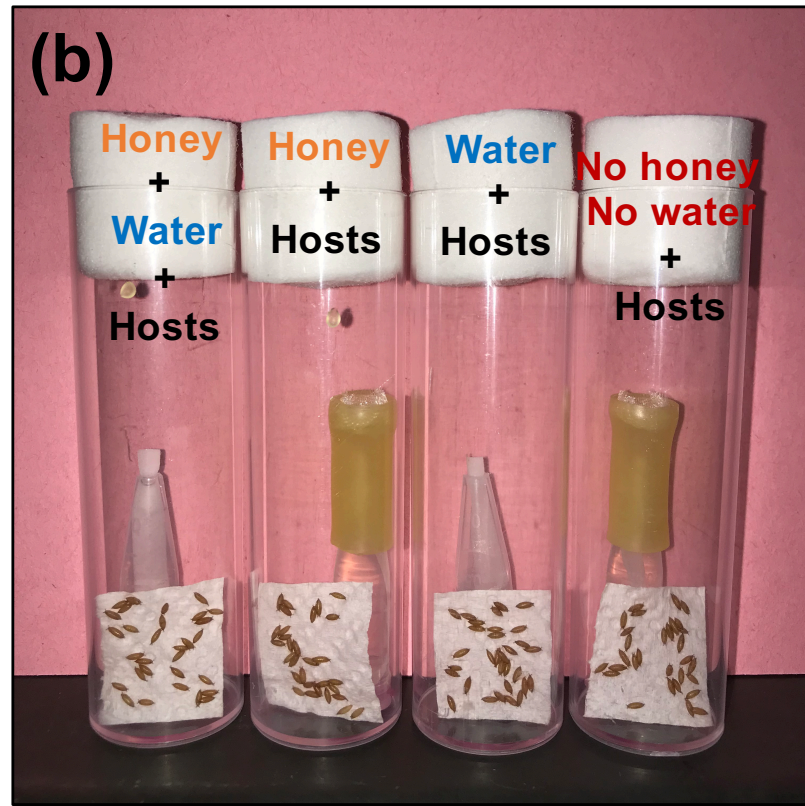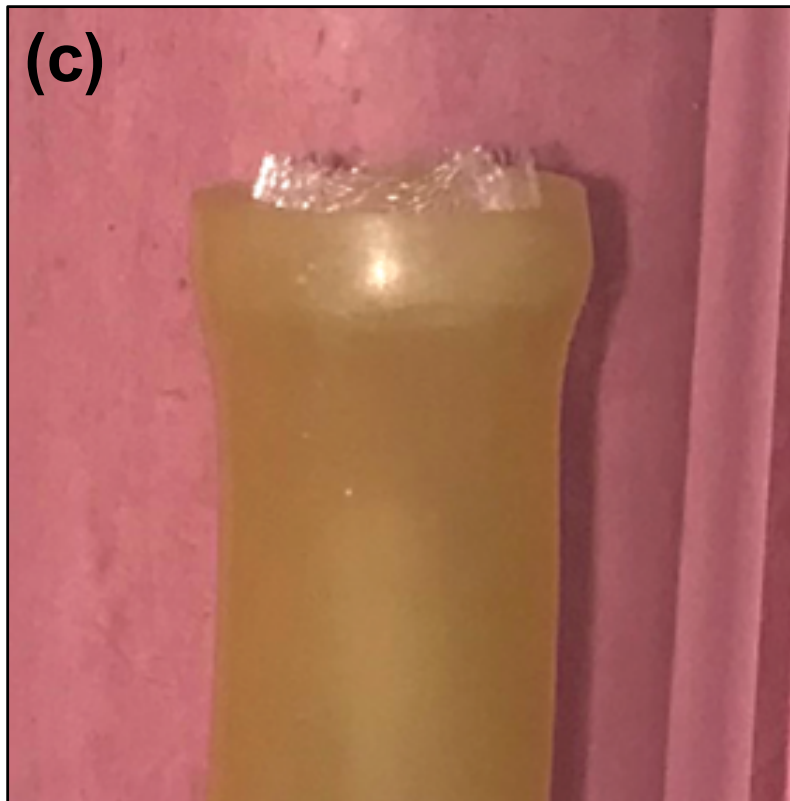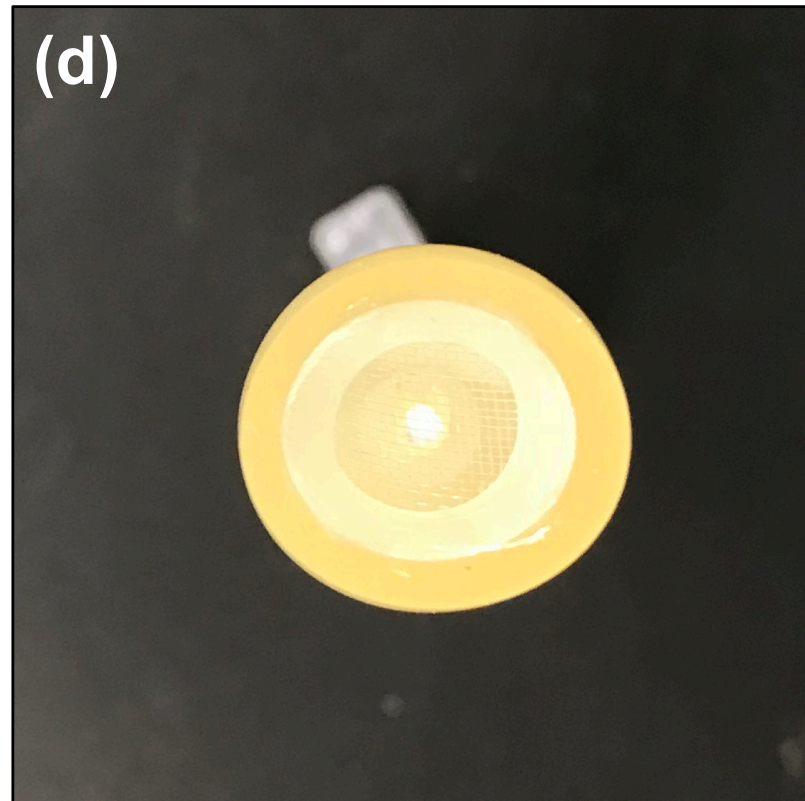

Supplementary Figure S1. Experimental design and delivery of water, honey, and hosts. (a) Flat tubes containing sources of water and/or honey (or none) were used to study different life-history traits of females of *Pachycrepoideus vindemmiae* (Hymenoptera: Pteromalidae). (b) Flat tubes providing the same water/honey regimens as previous image plus hosts (pupae of spotted-wing drosophila, *Drosophila suzukii*). (c) Lateral view of the screen cap used to cover the water source and prevent wasp from drinking water while allowing vaporous water to dissipate within the tube. (d) Superior view of the screen cap.

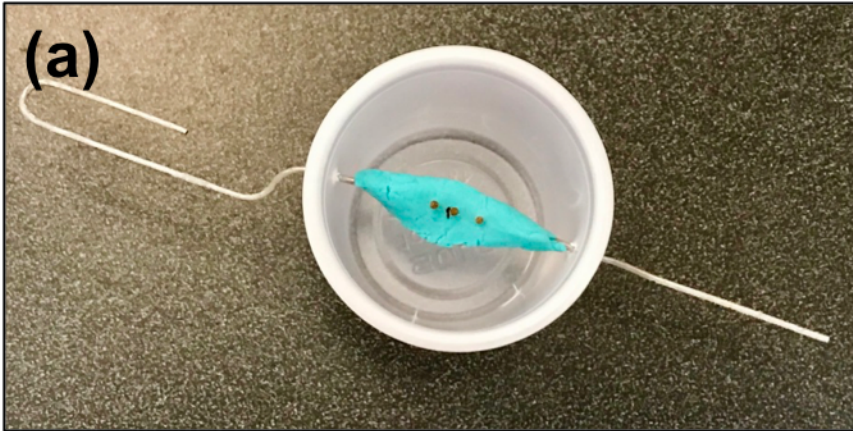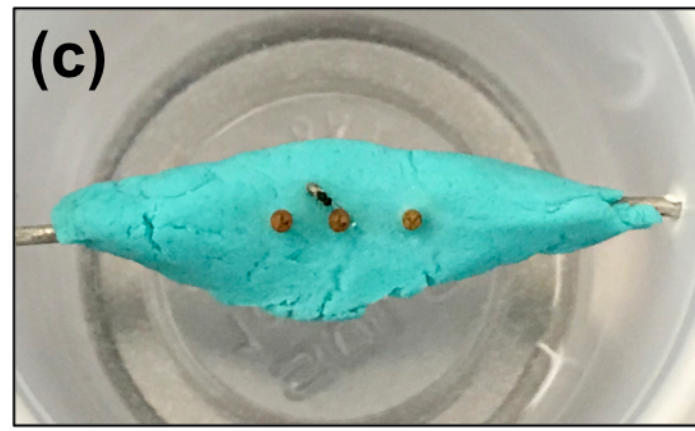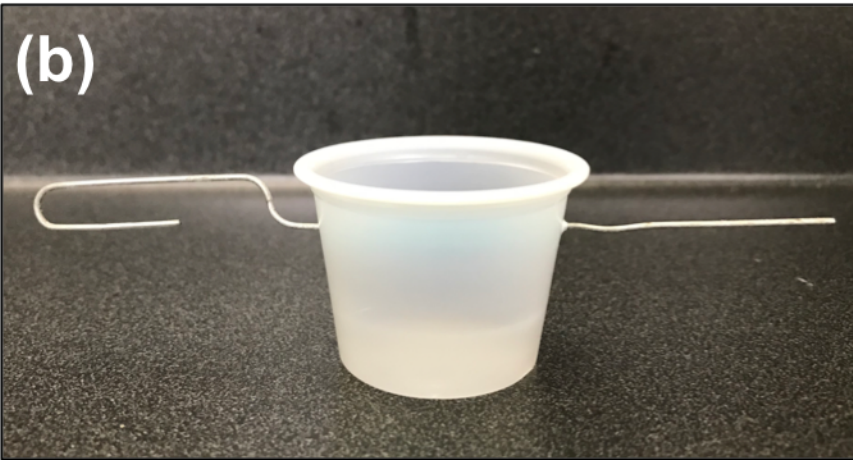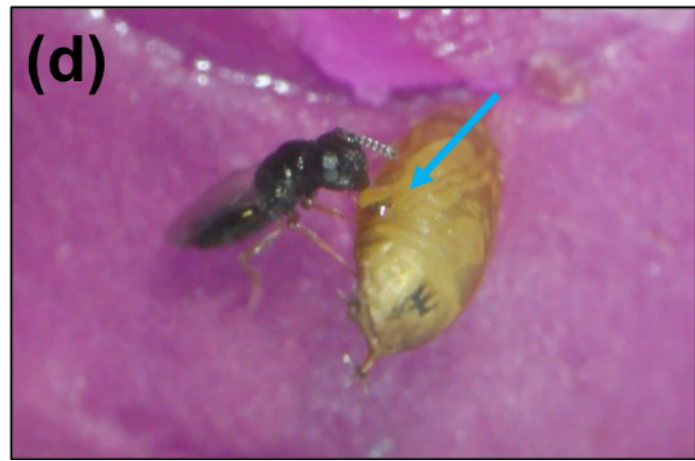

Supplementary Figure S2. Arena used to study the effects of water on the host-feeding behavior of females of *Pachycrepoideus vindemmiae* (Hymenoptera: Pteromalidae) on pupae of spotted-wing drosophila (SWD), *Drosophila suzukii*. (a) Superior view. (b) Lateral view. (c) Detail of a *P. vindemmiae* female approaching a SWD pupa. (d) Host-feeding of *P. vindemmiae* on the bled-out hemolymph (arrow) of a SWD pupa.

**Supplementary Table S1.** Results of the normality tests (Shapiro-Wilk, D'Agostino & Pearson, and Kolmogorov-Sminorv's,  $\alpha=0.05$ ) applied to various data sets collected to determine the effect of water, honey, water + honey, and fasting (no water, no honey) on life-history traits of females of *Pachycrepoideus vindemmiae* (Hymenoptera: Pteromalidae) reared on pupae of spotted-wing drosophila (SWD), *Drosophila suzukii*.

| <b>Normality tests</b>                           |               |         |         |         |
|--------------------------------------------------|---------------|---------|---------|---------|
| <i>SWD Emergence</i>                             |               |         |         |         |
|                                                  | Water + Honey | Honey   | Water   | Fasting |
| "Number of values"                               | 10            | 14      | 11      | 13      |
| Minimum                                          | 5.48          | 2.04    | 2.01    | 2.03    |
| "25% Percentile"                                 | 8.085         | 3.818   | 9.86    | 3.38    |
| Median                                           | 12.49         | 6.02    | 13.01   | 5.41    |
| "75% Percentile"                                 | 17.67         | 9.123   | 18.62   | 10.42   |
| Maximum                                          | 20.95         | 14.09   | 25.53   | 16.89   |
| Mean                                             | 12.82         | 6.611   | 14.17   | 7.038   |
| "Std. Deviation"                                 | 5.373         | 3.468   | 6.56    | 4.659   |
| "Std. Error of Mean"                             | 1.699         | 0.9268  | 1.978   | 1.292   |
| "Lower 95% CI of mean"                           | 8.972         | 4.609   | 9.765   | 4.223   |
| "Upper 95% CI of mean"                           | 16.66         | 8.614   | 18.58   | 9.854   |
| Sum                                              | 128.2         | 92.56   | 155.9   | 91.5    |
| <i>"D'Agostino &amp; Pearson normality test"</i> |               |         |         |         |
| K2                                               | 0.6654        | 1.361   | 0.07418 | 2.711   |
| "P value"                                        | 0.7170        | 0.5065  | 0.9636  | 0.2578  |
| Passed normality (a=0.05)?                       | Yes           | Yes     | Yes     | Yes     |
| "P value summary"                                | ns            | ns      | ns      | ns      |
| <i>"Shapiro-Wilk normality test"</i>             |               |         |         |         |
| W                                                | 0.9539        | 0.9566  | 0.9777  | 0.8933  |
| "P value"                                        | 0.7145        | 0.6673  | 0.9521  | 0.1082  |
| Passed normality (a=0.05)?                       | Yes           | Yes     | Yes     | Yes     |
| "P value summary"                                | ns            | ns      | ns      | ns      |
| <i>"KS normality test"</i>                       |               |         |         |         |
| "KS distance"                                    | 0.1094        | 0.1369  | 0.1426  | 0.1751  |
| "P value"                                        | >0.1000       | >0.1000 | >0.1000 | >0.1000 |
| Passed normality (a=0.05)?                       | Yes           | Yes     | Yes     | Yes     |
| "P value summary"                                | ns            | ns      | ns      | ns      |
| <i>Parasitoid Emergence</i>                      |               |         |         |         |
|                                                  | Water + Honey | Honey   | Water   | Fasting |
| "Number of values"                               | 10            | 14      | 11      | 13      |
| Minimum                                          | 59.76         | 67.6    | 60.34   | 67.59   |
| "25% Percentile"                                 | 67.24         | 71.63   | 63.86   | 72      |
| Median                                           | 72.09         | 76.03   | 68.8    | 77.03   |
| "75% Percentile"                                 | 78.61         | 80.28   | 75.57   | 81.38   |
| Maximum                                          | 83.71         | 85.63   | 80.68   | 84.44   |

|                                                  |         |         |         |         |
|--------------------------------------------------|---------|---------|---------|---------|
| Mean                                             | 72.26   | 76.14   | 70.6    | 76.72   |
| "Std. Deviation"                                 | 7.314   | 5.217   | 6.775   | 5.366   |
| "Std. Error of Mean"                             | 2.313   | 1.394   | 2.043   | 1.488   |
| "Lower 95% CI of mean"                           | 67.02   | 73.12   | 66.05   | 73.48   |
| "Upper 95% CI of mean"                           | 77.49   | 79.15   | 75.16   | 79.96   |
| Sum                                              | 722.6   | 1066    | 776.7   | 997.4   |
| <i>"D'Agostino &amp; Pearson normality test"</i> |         |         |         |         |
| K2                                               | 0.02286 | 0.3564  | 0.8655  | 0.798   |
| "P value"                                        | 0.9886  | 0.8368  | 0.6487  | 0.6710  |
| Passed normality (a=0.05)?                       | Yes     | Yes     | Yes     | Yes     |
| "P value summary"                                | ns      | ns      | ns      | ns      |
| <i>"Shapiro-Wilk normality test"</i>             |         |         |         |         |
| W                                                | 0.973   | 0.9814  | 0.9533  | 0.9632  |
| "P value"                                        | 0.9168  | 0.9819  | 0.6858  | 0.8016  |
| Passed normality (a=0.05)?                       | Yes     | Yes     | Yes     | Yes     |
| "P value summary"                                | ns      | ns      | ns      | ns      |
| <i>"KS normality test"</i>                       |         |         |         |         |
| "KS distance"                                    | 0.1343  | 0.112   | 0.1505  | 0.1155  |
| "P value"                                        | >0.1000 | >0.1000 | >0.1000 | >0.1000 |
| Passed normality (a=0.05)?                       | Yes     | Yes     | Yes     | Yes     |
| "P value summary"                                | ns      | ns      | ns      | ns      |

**Miscellaneous attacks**

|                                                  | Water + Honey | Honey  | Water  | Fasting |
|--------------------------------------------------|---------------|--------|--------|---------|
| "Number of values"                               | 10            | 14     | 11     | 13      |
| Minimum                                          | 3.4           | 2.8    | 2.1    | 4.9     |
| "25% Percentile"                                 | 5.35          | 7.45   | 5.9    | 6.8     |
| Median                                           | 6.9           | 12.9   | 7      | 11.1    |
| "75% Percentile"                                 | 9.55          | 16.15  | 15.4   | 16.2    |
| Maximum                                          | 11.2          | 21.5   | 19.5   | 22.9    |
| Mean                                             | 7.211         | 12.19  | 9.627  | 12.03   |
| "Std. Deviation"                                 | 2.523         | 5.68   | 5.615  | 5.567   |
| "Std. Error of Mean"                             | 0.8409        | 1.518  | 1.693  | 1.544   |
| "Lower 95% CI of mean"                           | 5.272         | 8.906  | 5.855  | 8.667   |
| "Upper 95% CI of mean"                           | 9.15          | 15.47  | 13.4   | 15.39   |
| Sum                                              | 64.9          | 170.6  | 105.9  | 156.4   |
| <i>"D'Agostino &amp; Pearson normality test"</i> |               |        |        |         |
| K2                                               | 0.227         | 0.5214 | 1.439  | 0.8013  |
| "P value"                                        | 0.8927        | 0.7705 | 0.4870 | 0.6699  |
| Passed normality (a=0.05)?                       | Yes           | Yes    | Yes    | Yes     |
| "P value summary"                                | ns            | ns     | ns     | ns      |

*"Shapiro-Wilk normality test"*

|                            |        |        |        |        |
|----------------------------|--------|--------|--------|--------|
| W                          | 0.9767 | 0.9653 | 0.914  | 0.9539 |
| "P value"                  | 0.9450 | 0.8083 | 0.2715 | 0.6583 |
| Passed normality (a=0.05)? | Yes    | Yes    | Yes    | Yes    |
| "P value summary"          | ns     | ns     | ns     | ns     |

*"KS normality test"*

|                            |         |         |         |         |
|----------------------------|---------|---------|---------|---------|
| "KS distance"              | 0.1368  | 0.1368  | 0.2255  | 0.134   |
| "P value"                  | >0.1000 | >0.1000 | >0.1000 | >0.1000 |
| Passed normality (a=0.05)? | Yes     | Yes     | Yes     | Yes     |
| "P value summary"          | ns      | ns      | ns      | ns      |

***Parasitoid Offspring Mortality***

|                        | Water + Honey | Honey  | Water  | Fasting |
|------------------------|---------------|--------|--------|---------|
| "Number of values"     | 10            | 14     | 11     | 13      |
| Minimum                | 0             | 0      | 0      | 0       |
| "25% Percentile"       | 0.56          | 0.5575 | 0.56   | 0       |
| Median                 | 1.15          | 1.69   | 1.14   | 0.57    |
| "75% Percentile"       | 2.878         | 3.35   | 1.7    | 1.725   |
| Maximum                | 3.91          | 5.03   | 3.69   | 3.41    |
| Mean                   | 1.494         | 1.93   | 1.176  | 1.045   |
| "Std. Deviation"       | 1.299         | 1.529  | 1.048  | 1.122   |
| "Std. Error of Mean"   | 0.4107        | 0.4087 | 0.3161 | 0.3111  |
| "Lower 95% CI of mean" | 0.565         | 1.047  | 0.4721 | 0.3677  |
| "Upper 95% CI of mean" | 2.423         | 2.813  | 1.881  | 1.723   |
| Sum                    | 14.94         | 27.02  | 12.94  | 13.59   |

*"D'Agostino & Pearson normality test"*

|                            |        |        |        |        |
|----------------------------|--------|--------|--------|--------|
| K2                         | 1.855  | 1.053  | 6.902  | 3.075  |
| "P value"                  | 0.3955 | 0.5907 | 0.0317 | 0.2149 |
| Passed normality (a=0.05)? | Yes    | Yes    | No     | Yes    |
| "P value summary"          | ns     | ns     | *      | ns     |

*"Shapiro-Wilk normality test"*

|                            |        |        |        |        |
|----------------------------|--------|--------|--------|--------|
| W                          | 0.8629 | 0.9451 | 0.8765 | 0.8532 |
| "P value"                  | 0.0825 | 0.4870 | 0.0938 | 0.0314 |
| Passed normality (a=0.05)? | Yes    | Yes    | Yes    | No     |
| "P value summary"          | ns     | ns     | ns     | *      |

*"KS normality test"*

|                            |        |         |         |         |
|----------------------------|--------|---------|---------|---------|
| "KS distance"              | 0.3015 | 0.1312  | 0.1979  | 0.2144  |
| "P value"                  | 0.0104 | >0.1000 | >0.1000 | >0.1000 |
| Passed normality (a=0.05)? | No     | Yes     | Yes     | Yes     |
| "P value summary"          | *      | ns      | ns      | ns      |

***Natural SWD Death***

|                    | Water + Honey | Honey | Water | Fasting |
|--------------------|---------------|-------|-------|---------|
| "Number of values" | 10            | 14    | 11    | 13      |
| Minimum            | 6             | 5.84  | 6.02  | 5.9     |
| "25% Percentile"   | 6.07          | 5.96  | 6.04  | 6.02    |
| Median             | 6.12          | 6.04  | 6.16  | 6.08    |

|                                                  |         |         |         |         |
|--------------------------------------------------|---------|---------|---------|---------|
| "75% Percentile"                                 | 6.26    | 6.22    | 6.32    | 6.23    |
| Maximum                                          | 6.47    | 6.64    | 6.38    | 6.25    |
| Mean                                             | 6.166   | 6.106   | 6.17    | 6.106   |
| "Std. Deviation"                                 | 0.1424  | 0.2064  | 0.1306  | 0.1169  |
| "Std. Error of Mean"                             | 0.04502 | 0.05516 | 0.03938 | 0.03241 |
| "Lower 95% CI of mean"                           | 6.064   | 5.987   | 6.082   | 6.036   |
| "Upper 95% CI of mean"                           | 6.268   | 6.225   | 6.258   | 6.177   |
| Sum                                              | 61.66   | 85.48   | 67.87   | 79.38   |
| <i>"D'Agostino &amp; Pearson normality test"</i> |         |         |         |         |
| K2                                               | 3.219   | 8.093   | 1.684   | 0.8118  |
| "P value"                                        | 0.2000  | 0.0175  | 0.4309  | 0.6664  |
| Passed normality (a=0.05)?                       | Yes     | No      | Yes     | Yes     |
| "P value summary"                                | ns      | *       | ns      | ns      |
| <i>"Shapiro-Wilk normality test"</i>             |         |         |         |         |
| W                                                | 0.9102  | 0.896   | 0.8856  | 0.9139  |
| "P value"                                        | 0.2823  | 0.0986  | 0.1226  | 0.2073  |
| Passed normality (a=0.05)?                       | Yes     | Yes     | Yes     | Yes     |
| "P value summary"                                | ns      | ns      | ns      | ns      |
| <i>"KS normality test"</i>                       |         |         |         |         |
| "KS distance"                                    | 0.2271  | 0.1963  | 0.2038  | 0.1807  |
| "P value"                                        | >0.1000 | >0.1000 | >0.1000 | >0.1000 |
| Passed normality (a=0.05)?                       | Yes     | Yes     | Yes     | Yes     |
| "P value summary"                                | ns      | ns      | ns      | ns      |

---

**Supplementary Table S2.** Results of the homoscedasticity tests (Barlett and Brown-Forsythe's,  $\alpha=0.05$ ) applied to various data sets collected to determine the effect of water, honey, water + honey, and fasting (no water, no honey) on life-history traits of females of *Pachycrepoideus vindemniae* (Hymenoptera: Pteromalidae) reared on pupae of spotted-wing drosophila (SWD), *Drosophila suzukii*.

| <b>Homoscedasticity tests</b>            |                                       |       |       |         |
|------------------------------------------|---------------------------------------|-------|-------|---------|
|                                          | <b>SWD Emergence</b>                  |       |       |         |
| "Data sets analyzed"                     | Water+Honey                           | Honey | Water | Fasting |
|                                          | <i>"Brown-Forsythe test"</i>          |       |       |         |
| " F (DFn, DFd)"                          | "1.397 (3, 44)"                       |       |       |         |
| " P value"                               | 0.2564                                |       |       |         |
| " P value summary"                       | ns                                    |       |       |         |
| " Are SDs signif. different (P < 0.05)?" | No                                    |       |       |         |
|                                          | <i>"Bartlett's test"</i>              |       |       |         |
| " Bartlett's statistic (corrected)"      | 4.583                                 |       |       |         |
| " P value"                               | 0.2050                                |       |       |         |
| " P value summary"                       | ns                                    |       |       |         |
| " Are SDs signif. different (P < 0.05)?" | No                                    |       |       |         |
|                                          | <b>Parasitoid Emergence</b>           |       |       |         |
| "Data sets analyzed"                     | Water+Honey                           | Honey | Water | Fasting |
|                                          | <i>"Brown-Forsythe test"</i>          |       |       |         |
| " F (DFn, DFd)"                          | "0.6163 (3, 44)"                      |       |       |         |
| " P value"                               | 0.6081                                |       |       |         |
| " P value summary"                       | ns                                    |       |       |         |
| " Are SDs signif. different (P < 0.05)?" | No                                    |       |       |         |
|                                          | <i>"Bartlett's test"</i>              |       |       |         |
| " Bartlett's statistic (corrected)"      | 1.778                                 |       |       |         |
| " P value"                               | 0.6198                                |       |       |         |
| " P value summary"                       | ns                                    |       |       |         |
| " Are SDs signif. different (P < 0.05)?" | No                                    |       |       |         |
|                                          | <b>Miscellaneous attacks</b>          |       |       |         |
| "Data sets analyzed"                     | Water+Honey                           | Honey | Water | Fasting |
|                                          | <i>"Brown-Forsythe test"</i>          |       |       |         |
| " F (DFn, DFd)"                          | "1.471 (3, 44)"                       |       |       |         |
| " P value"                               | 0.2357                                |       |       |         |
| " P value summary"                       | ns                                    |       |       |         |
| " Are SDs signif. different (P < 0.05)?" | No                                    |       |       |         |
|                                          | <i>"Bartlett's test"</i>              |       |       |         |
| " Bartlett's statistic (corrected)"      | 5.684                                 |       |       |         |
| " P value"                               | 0.1280                                |       |       |         |
| " P value summary"                       | ns                                    |       |       |         |
| " Are SDs signif. different (P < 0.05)?" | No                                    |       |       |         |
|                                          | <b>Parasitoid Offspring Mortality</b> |       |       |         |
| "Data sets analyzed"                     | Water+Honey                           | Honey | Water | Fasting |



---

|                                          |                              |       |       |         |
|------------------------------------------|------------------------------|-------|-------|---------|
|                                          | <i>"Brown-Forsythe test"</i> |       |       |         |
| " F (DFn, DFd)"                          | "0.6783 (3, 44)"             |       |       |         |
| " P value"                               | 0.5700                       |       |       |         |
| " P value summary"                       | ns                           |       |       |         |
| " Are SDs signif. different (P < 0.05)?" | No                           |       |       |         |
|                                          | <i>"Bartlett's test"</i>     |       |       |         |
| " Bartlett's statistic (corrected)"      | 1.945                        |       |       |         |
| " P value"                               | 0.5840                       |       |       |         |
| " P value summary"                       | ns                           |       |       |         |
| " Are SDs signif. different (P < 0.05)?" | No                           |       |       |         |
|                                          | <b>Natural SWD Death</b>     |       |       |         |
| "Data sets analyzed"                     | Water+Honey                  | Honey | Water | Fasting |
|                                          | <i>"Brown-Forsythe test"</i> |       |       |         |
| " F (DFn, DFd)"                          | "0.6456 (3, 44)"             |       |       |         |
| " P value"                               | 0.5899                       |       |       |         |
| " P value summary"                       | ns                           |       |       |         |
| " Are SDs signif. different (P < 0.05)?" | No                           |       |       |         |
|                                          | <i>"Bartlett's test"</i>     |       |       |         |
| " Bartlett's statistic (corrected)"      | 4.666                        |       |       |         |
| " P value"                               | 0.1980                       |       |       |         |
| " P value summary"                       | ns                           |       |       |         |
| " Are SDs signif. different (P < 0.05)?" | No                           |       |       |         |

---

**Supplementary Video S1.** Female of *Pachycrepoideus vindemmiae* (Hymenoptera: Pteromalidae) withdrawing her ovipositor from a pupae of spotted-wing drosophila (SWD), *Drosophila suzukii*, and feeding on a drop of hemolymph that extrudes from it.
